# Supplementary material for: Voluntary Organizations: Commitment, Leadership, and Organizational Effectiveness.
Source: MDPI journal article supplement (doi:10.3390/biology11030392), 2004-03-01
Supplement: s1 [file s1]

**Table S1.** Variations of training measures/cardiorespiratory fitness, body composition and metabolic parameters before and after the 12-week training intervention program

| Variable                                                                                                                                                                                                                                                                                                                                                                                                                                                                                                                                                                                                                                   | Intervention Effect            |                                 |                                              |
|--------------------------------------------------------------------------------------------------------------------------------------------------------------------------------------------------------------------------------------------------------------------------------------------------------------------------------------------------------------------------------------------------------------------------------------------------------------------------------------------------------------------------------------------------------------------------------------------------------------------------------------------|--------------------------------|---------------------------------|----------------------------------------------|
|                                                                                                                                                                                                                                                                                                                                                                                                                                                                                                                                                                                                                                            | <i>BDC</i><br><i>Mean ± SD</i> | <i>PTDC</i><br><i>Mean ± SD</i> | <i>Paired Samples Test</i><br><i>P value</i> |
| VO2 peak (ml)                                                                                                                                                                                                                                                                                                                                                                                                                                                                                                                                                                                                                              | 2952.5±736.1                   | 3268.6±776.9                    | .000                                         |
| VO2 peak/weight (ml/kg)                                                                                                                                                                                                                                                                                                                                                                                                                                                                                                                                                                                                                    | 28.0±6.0                       | 32.9±6.7                        | .000                                         |
| HR (bpm)                                                                                                                                                                                                                                                                                                                                                                                                                                                                                                                                                                                                                                   | 72.7±10.7                      | 62.0±9.8                        | .000                                         |
| SBP (mmHg)                                                                                                                                                                                                                                                                                                                                                                                                                                                                                                                                                                                                                                 | 126.9±14.2                     | 126.5±12.4                      | .818                                         |
| DBP mmHg)                                                                                                                                                                                                                                                                                                                                                                                                                                                                                                                                                                                                                                  | 74.2±10.4                      | 68.6±10.1                       | .003                                         |
| DAI (kcal/die)                                                                                                                                                                                                                                                                                                                                                                                                                                                                                                                                                                                                                             | 2058.9±652.1                   | 1657.4±529.8                    | .000                                         |
| Weight (kg)                                                                                                                                                                                                                                                                                                                                                                                                                                                                                                                                                                                                                                | 105.3±14.4                     | 99.4±14.4                       | .000                                         |
| BMI (kg/mq)                                                                                                                                                                                                                                                                                                                                                                                                                                                                                                                                                                                                                                | 35.6±4.4                       | 33.6±4.5                        | .000                                         |
| Waist (cm)                                                                                                                                                                                                                                                                                                                                                                                                                                                                                                                                                                                                                                 | 113.3±11.6                     | 109.3±12.4                      | .000                                         |
| FM (kg)                                                                                                                                                                                                                                                                                                                                                                                                                                                                                                                                                                                                                                    | 38.0±9.5                       | 32.7±9.4                        | .000                                         |
| FM (%)                                                                                                                                                                                                                                                                                                                                                                                                                                                                                                                                                                                                                                     | 36.5±8.3                       | 33.2±8.8                        | .000                                         |
| FFM (kg)                                                                                                                                                                                                                                                                                                                                                                                                                                                                                                                                                                                                                                   | 67.3±13.7                      | 66.6±13.8                       | .240                                         |
| FFM (%)                                                                                                                                                                                                                                                                                                                                                                                                                                                                                                                                                                                                                                    | 63.5±8.3                       | 66.7±8.8                        | .000                                         |
| Glucose (mg/dl)                                                                                                                                                                                                                                                                                                                                                                                                                                                                                                                                                                                                                            | 98.7±9.3                       | 96.9±8.8                        | .145                                         |
| Insulin (μU/ml)                                                                                                                                                                                                                                                                                                                                                                                                                                                                                                                                                                                                                            | 10.2±5.2                       | 9.6±10.0                        | .651                                         |
| HOMA index                                                                                                                                                                                                                                                                                                                                                                                                                                                                                                                                                                                                                                 | 2.5±1.4                        | 2.4±2.8                         | .715                                         |
| IGF1 (ng/ml)                                                                                                                                                                                                                                                                                                                                                                                                                                                                                                                                                                                                                               | 207.2±76.3                     | 208.9±74.6                      | .788                                         |
| Cortisol (ng/ml)                                                                                                                                                                                                                                                                                                                                                                                                                                                                                                                                                                                                                           | 96.5±34.2                      | 85.6±25.9                       | .072                                         |
| hsCRP (mg/dl)                                                                                                                                                                                                                                                                                                                                                                                                                                                                                                                                                                                                                              | .3±.4                          | .4±.5                           | .444                                         |
| Total-C (mg/dl)                                                                                                                                                                                                                                                                                                                                                                                                                                                                                                                                                                                                                            | 220.0±37.2                     | 202.0±37.0                      | .001                                         |
| LDL-C (mg/dl)                                                                                                                                                                                                                                                                                                                                                                                                                                                                                                                                                                                                                              | 145.3±30.1                     | 129.7±33.7                      | .001                                         |
| HDL-C (mg/dl)                                                                                                                                                                                                                                                                                                                                                                                                                                                                                                                                                                                                                              | 50.0±13.0                      | 48.2±10.9                       | .163                                         |
| Triglycerides (mg/dl)                                                                                                                                                                                                                                                                                                                                                                                                                                                                                                                                                                                                                      | 123.6±71.4                     | 120.9±72.6                      | .811                                         |
| Irisin (μg/ml)                                                                                                                                                                                                                                                                                                                                                                                                                                                                                                                                                                                                                             | 6.5±1.3                        | 5.6±1.1                         | .000                                         |
| FNDC5 gene expression (RQ)                                                                                                                                                                                                                                                                                                                                                                                                                                                                                                                                                                                                                 | 1.3±.4                         | 1.3±.6                          | .596                                         |
| VO2, Volume of Oxygen; HR, Heart rate; SBP, Systolic Blood Pressure; DBP, Diastolic Blood Pressure; DCI, Daily Calorie Intake;<br>BMI, Body Mass Index; Waist, Waist circumference; FM, Fat Mass; FFM, Free Fat Mass; HOMA IR index, HOmeostasis Model Assessment<br>Insulin Resistance; IGF1, Insulin-like Growth Factor 1; hsCRP, high-sensitivity C-Reactive Protein; Total-C, Total Cholesterol; LDL-C, LDL<br>Cholesterol calculated using Friedewald's Equation; HDL-C, HDL Cholesterol.<br>BDC, Baseline Data Collection; PTDC, Post Training Data Collection.<br>Data analysed with Paired Samples Test and expressed as means±SD. |                                |                                 |                                              |

**Table S2.** Bivariate Correlation Analyses between Irisin Plasma Levels or FNDC5 Gene Expression and Clinical Characteristics of Participants before and after the 12-week Training Program

|                                                                                                                                                                                                                                                                                                                                                                                                                                                                                                                                                                                                                                                                                                                                                                                  |        | Irisin (µg/ml)       |         |                      |         |                      |         | FNDC5 gene expression (RQ) |         |                      |         |                      |         |
|----------------------------------------------------------------------------------------------------------------------------------------------------------------------------------------------------------------------------------------------------------------------------------------------------------------------------------------------------------------------------------------------------------------------------------------------------------------------------------------------------------------------------------------------------------------------------------------------------------------------------------------------------------------------------------------------------------------------------------------------------------------------------------|--------|----------------------|---------|----------------------|---------|----------------------|---------|----------------------------|---------|----------------------|---------|----------------------|---------|
|                                                                                                                                                                                                                                                                                                                                                                                                                                                                                                                                                                                                                                                                                                                                                                                  |        | BDC                  |         | PTDC                 |         | Change PTDC vs BDC   |         | BDC                        |         | PTDC                 |         | Change PTDC vs BDC   |         |
|                                                                                                                                                                                                                                                                                                                                                                                                                                                                                                                                                                                                                                                                                                                                                                                  |        | Rho                  | P value | Rho                  | P value | Rho                  | P value | Rho                        | P value | Rho                  | P value | Rho                  | P value |
| Age (years)                                                                                                                                                                                                                                                                                                                                                                                                                                                                                                                                                                                                                                                                                                                                                                      |        | .065                 | .723    | -.086                | .644    | -.157                | .399    | -.300                      | .114    | -.534                | .003    | -.244                | .211    |
| Education (years)                                                                                                                                                                                                                                                                                                                                                                                                                                                                                                                                                                                                                                                                                                                                                                |        | .068                 | .710    | .052                 | .780    | .020                 | .914    | -.134                      | .487    | .246                 | .208    | .199                 | .311    |
| Max. weight in adulthood (kg)                                                                                                                                                                                                                                                                                                                                                                                                                                                                                                                                                                                                                                                                                                                                                    |        | -.257                | .216    | -.440                | .031    | -.201                | .346    | .229                       | .294    | -.002                | .992    | -.119                | .597    |
| Metabolic Syndrome score (n)                                                                                                                                                                                                                                                                                                                                                                                                                                                                                                                                                                                                                                                                                                                                                     |        | -.059                | .749    | -.181                | .331    | .060                 | .749    | .019                       | .924    | .097                 | .625    | .074                 | .709    |
|                                                                                                                                                                                                                                                                                                                                                                                                                                                                                                                                                                                                                                                                                                                                                                                  |        | median<br>[IQ range] |         | median<br>[IQ range] |         | median<br>[IQ range] |         | median<br>[IQ range]       |         | median<br>[IQ range] |         | median<br>[IQ range] |         |
| Sex                                                                                                                                                                                                                                                                                                                                                                                                                                                                                                                                                                                                                                                                                                                                                                              | male   | 5.6                  | .005    | 5.0                  | .001    | -.5                  | .892    | 1.4                        | .988    | 1.1                  | .104    | -.1                  | .164    |
|                                                                                                                                                                                                                                                                                                                                                                                                                                                                                                                                                                                                                                                                                                                                                                                  | female | 6.8                  |         | 6.3                  |         | -.9                  |         | 1.3                        |         | 1.4                  |         | .1                   |         |
| Overweight/obesity in childhood                                                                                                                                                                                                                                                                                                                                                                                                                                                                                                                                                                                                                                                                                                                                                  | no     | 6.19                 | .677    | 5.22                 | .482    | -.51                 | .726    | 1.21                       | .392    | 1.28                 | .815    | .17                  | .482    |
|                                                                                                                                                                                                                                                                                                                                                                                                                                                                                                                                                                                                                                                                                                                                                                                  | yes    | 6.43                 |         | 6.01                 |         | -.79                 |         | 1.41                       |         | 1.21                 |         | -.13                 |         |
| Overweight/obesity at puberty/menarche                                                                                                                                                                                                                                                                                                                                                                                                                                                                                                                                                                                                                                                                                                                                           | no     | 5.58                 | .158    | 4.79                 | .251    | -.43                 | .581    | 1.15                       | .319    | 1.24                 | .704    | .16                  | .649    |
|                                                                                                                                                                                                                                                                                                                                                                                                                                                                                                                                                                                                                                                                                                                                                                                  | yes    | 6.47                 |         | 5.85                 |         | -.82                 |         | 1.41                       |         | 1.22                 |         | -.07                 |         |
| Previous attempts to weight loss                                                                                                                                                                                                                                                                                                                                                                                                                                                                                                                                                                                                                                                                                                                                                 | no     | 5.60                 | .238    | 5.44                 | .877    | -.46                 | .725    | 2.82                       | .016    | 1.88                 | .455    | -.18                 | .818    |
|                                                                                                                                                                                                                                                                                                                                                                                                                                                                                                                                                                                                                                                                                                                                                                                  | yes    | 6.29                 |         | 5.67                 |         | -.65                 |         | 1.31                       |         | 1.22                 |         | .06                  |         |
| Elevated Glucose criteria                                                                                                                                                                                                                                                                                                                                                                                                                                                                                                                                                                                                                                                                                                                                                        | no     | 6.39                 | .455    | 5.88                 | .247    | -.99                 | .520    | 1.33                       | .813    | 1.19                 | .910    | -.12                 | .667    |
|                                                                                                                                                                                                                                                                                                                                                                                                                                                                                                                                                                                                                                                                                                                                                                                  | yes    | 6.19                 |         | 5.47                 |         | -.50                 |         | 1.30                       |         | 1.22                 |         | .10                  |         |
| Insulin Resistance according to HOMA IR model                                                                                                                                                                                                                                                                                                                                                                                                                                                                                                                                                                                                                                                                                                                                    | <2.0   | 6.04                 | .823    | 5.22                 | .653    | -1.19                | .200    | 1.29                       | .101    | 1.17                 | .599    | .00                  | .956    |
|                                                                                                                                                                                                                                                                                                                                                                                                                                                                                                                                                                                                                                                                                                                                                                                  | ≥2.0   | 6.21                 |         | 5.89                 |         | -.36                 |         | 1.54                       |         | 1.36                 |         | .07                  |         |
| Hypertension criteria                                                                                                                                                                                                                                                                                                                                                                                                                                                                                                                                                                                                                                                                                                                                                            | no     | 6.58                 | .536    | 5.66                 | .830    | -.50                 | .468    | 1.32                       | .897    | 1.15                 | .274    | .06                  | .618    |
|                                                                                                                                                                                                                                                                                                                                                                                                                                                                                                                                                                                                                                                                                                                                                                                  | yes    | 5.89                 |         | 5.51                 |         | -.65                 |         | 1.37                       |         | 1.32                 |         | .11                  |         |
| Lipid criteria                                                                                                                                                                                                                                                                                                                                                                                                                                                                                                                                                                                                                                                                                                                                                                   | no     | 6.15                 | .716    | 5.72                 | .296    | -.65                 | .751    | 1.32                       | .799    | 1.21                 | .745    | .01                  | .672    |
|                                                                                                                                                                                                                                                                                                                                                                                                                                                                                                                                                                                                                                                                                                                                                                                  | yes    | 6.37                 |         | 4.93                 |         | -.51                 |         | 1.44                       |         | 1.17                 |         | .07                  |         |
| Metabolic Syndrome                                                                                                                                                                                                                                                                                                                                                                                                                                                                                                                                                                                                                                                                                                                                                               | <3.0   | 6.15                 | .863    | 5.75                 | .164    | -.50                 | .952    | 1.37                       | .512    | 1.17                 | .654    | -.12                 | .598    |
|                                                                                                                                                                                                                                                                                                                                                                                                                                                                                                                                                                                                                                                                                                                                                                                  | ≥3.0   | 6.20                 |         | 4.91                 |         | -.68                 |         | 1.21                       |         | 1.28                 |         | .10                  |         |
| Metabolic Syndrome, revised NCEP ATP III criteria for Metabolic Syndrome*; Elevated Glucose criteria, revised NCEP/ATP III criteria for elevated Glucose (Fasting Glucose ≥100 mg/dl and/or on drug treatment for elevated glucose); Hypertension criteria, revised NCEP/ATP III criteria for hypertension (history of hypertension and/or drug treatment for elevated blood pressure and/or blood pressure ≥130/85 mm Hg); Lipid criteria, revised NCEP/ATP III criteria for Lipid (TG ≥150 mg/dL and/or HDL-C <40 mg/dL in male or <50 mg/dL in female or On drug treatment for elevated triglycerides); BDC, Baseline Data Collection; PTDC, Post Training Data Collection. Data are expressed as Spearman's Rho or median [IQ, interquartile range] unless otherwise stated. |        |                      |         |                      |         |                      |         |                            |         |                      |         |                      |         |

\*Grundy SM, Cleeman JI, Daniels SR, Donato KA, Eckel RH, Franklin BA, Gordon DJ, Krauss RM, Savage PJ, Smith SC Jr. et al. Diagnosis and management of the metabolic syndrome: an American Heart Association/National Heart. Lung. and Blood Institute Scientific Statement. Circulation. 2005;112(17):2735–52.

**Table S3.** Bivariate Correlation Analyses between Irisin Plasma Levels or FNDC5 Gene Expression and Physical capacities/Training measures

|                                                                                                                                                                                                                                                                                         |                    | Irisin (µg/ml) |         |       |         |                    |         | FNDC5 gene expression (RQ) |         |       |         |                    |         |
|-----------------------------------------------------------------------------------------------------------------------------------------------------------------------------------------------------------------------------------------------------------------------------------------|--------------------|----------------|---------|-------|---------|--------------------|---------|----------------------------|---------|-------|---------|--------------------|---------|
|                                                                                                                                                                                                                                                                                         |                    | BDC            |         | PTDC  |         | Change PTDC vs BDC |         | BDC                        |         | PTDC  |         | Change PTDC vs BDC |         |
|                                                                                                                                                                                                                                                                                         |                    | Rho            | P value | Rho   | P value | Rho                | P value | Rho                        | P value | Rho   | P value | Rho                | P value |
| Number session (n)                                                                                                                                                                                                                                                                      |                    |                |         | .413  | .021    | .298               | .104    |                            |         | .210  | .283    | .043               | .828    |
| Time for session (min)                                                                                                                                                                                                                                                                  |                    |                |         | -.228 | .217    | .030               | .871    |                            |         | .027  | .891    | .061               | .759    |
| EEE/session (kcal/session)                                                                                                                                                                                                                                                              |                    |                |         | -.422 | .018    | .091               | .626    |                            |         | -.198 | .313    | -.150              | .447    |
| EEE/minute (kcal/min)                                                                                                                                                                                                                                                                   |                    |                |         | -.138 | .459    | .035               | .850    |                            |         | -.204 | .297    | -.183              | .352    |
| EEE/weight/session (kcal/kg/session)                                                                                                                                                                                                                                                    |                    |                |         | .141  | .450    | .098               | .600    |                            |         | .082  | .678    | .077               | .698    |
| VO <sub>2</sub> peak (ml)                                                                                                                                                                                                                                                               | BDC                | -.374          | .035    | -.422 | .018    | .088               | .637    | -.062                      | .751    | -.196 | .316    | -.193              | .326    |
|                                                                                                                                                                                                                                                                                         | PTDC               |                |         | -.372 | .039    | .139               | .455    |                            |         | -.214 | .274    | -.150              | .447    |
|                                                                                                                                                                                                                                                                                         | Change PTDC vs BDC |                |         | -.036 | .846    | .078               | .676    |                            |         | -.115 | .558    | .038               | .849    |
| VO <sub>2</sub> peak/weight (ml/kg)                                                                                                                                                                                                                                                     | BDC                | -.243          | .180    | -.286 | .119    | .082               | .660    | -.063                      | .747    | -.186 | .344    | -.203              | .300    |
|                                                                                                                                                                                                                                                                                         | PTDC               |                |         | -.240 | .194    | .104               | .578    |                            |         | -.253 | .194    | -.187              | .342    |
|                                                                                                                                                                                                                                                                                         | Change PTDC vs BDC |                |         | -.027 | .884    | .062               | .742    |                            |         | -.247 | .205    | -.135              | .493    |
| HR (bpm)                                                                                                                                                                                                                                                                                | BDC                | -.042          | .821    | .258  | .162    | .363               | .045    | -.024                      | .903    | .301  | .120    | .301               | .120    |
|                                                                                                                                                                                                                                                                                         | PTDC               |                |         | .305  | .095    | .267               | .147    |                            |         | .030  | .881    | .062               | .754    |
|                                                                                                                                                                                                                                                                                         | Change PTDC vs BDC |                |         | .014  | .941    | -.180              | .333    |                            |         | -.395 | .037    | -.301              | .120    |
| SBP (mmHg)                                                                                                                                                                                                                                                                              | BDC                | -.177          | .331    | -.109 | .559    | .059               | .754    | .141                       | .467    | .090  | .649    | -.073              | .710    |
|                                                                                                                                                                                                                                                                                         | PTDC               |                |         | .207  | .265    | .159               | .392    |                            |         | .208  | .289    | .133               | .499    |
|                                                                                                                                                                                                                                                                                         | Change PTDC vs BDC |                |         | .454  | .010    | .055               | .767    |                            |         | .136  | .489    | .188               | .337    |
| DBP (mmHg)                                                                                                                                                                                                                                                                              | BDC                | -.141          | .440    | -.032 | .863    | .158               | .396    | -.077                      | .690    | -.076 | .702    | -.062              | .752    |
|                                                                                                                                                                                                                                                                                         | PTDC               |                |         | -.074 | .691    | -.107              | .566    |                            |         | .009  | .965    | .001               | .994    |
|                                                                                                                                                                                                                                                                                         | Change PTDC vs BDC |                |         | -.019 | .921    | -.228              | .218    |                            |         | -.027 | .891    | -.052              | .795    |
| DCI (kcal/die)                                                                                                                                                                                                                                                                          | BDC                | -.171          | .349    | -.152 | .416    | .096               | .608    | .168                       | .384    | .070  | .725    | -.157              | .426    |
|                                                                                                                                                                                                                                                                                         | PTDC               |                |         | -.221 | .231    | .134               | .473    |                            |         | .068  | .729    | .011               | .954    |
|                                                                                                                                                                                                                                                                                         | Change PTDC vs BDC |                |         | -.136 | .465    | .080               | .669    |                            |         | .037  | .853    | .342               | .075    |
| EEE, Energy Expenditure Exercise; VO <sub>2</sub> , Volume of Oxygen; HR, Heart rate; SBP, Systolic Blood Pressure; DBP, Diastolic Blood Pressure; DCI, Daily Calorie Intake. BDC, Baseline Data Collection; PTDC, Post Training Data Collection. Data are expressed as Spearman's Rho. |                    |                |         |       |         |                    |         |                            |         |       |         |                    |         |

**Table S4.** Bivariate Correlation Analyses between Irisin Plasma Levels or FND5 Gene Expression and Anthropometric and Body Composition Measures

|                                                                                                                                                                                               |                    | Irisin (μg/ml) |         |       |         |                    |         | FNDc5 gene expression (RQ) |         |       |         |                    |         |
|-----------------------------------------------------------------------------------------------------------------------------------------------------------------------------------------------|--------------------|----------------|---------|-------|---------|--------------------|---------|----------------------------|---------|-------|---------|--------------------|---------|
|                                                                                                                                                                                               |                    | BDC            |         | PTDC  |         | Change PTDC vs BDC |         | BDC                        |         | PTDC  |         | Change PTDC vs BDC |         |
|                                                                                                                                                                                               |                    | Rho            | P value | Rho   | P value | Rho                | P value | Rho                        | P value | Rho   | P value | Rho                | P value |
| Weight (kg)                                                                                                                                                                                   | BDC                | -.356          | .045    | -.330 | .070    | .070               | .709    | .067                       | .730    | -.018 | .929    | -.014              | .944    |
|                                                                                                                                                                                               | PTDC               |                |         | -.296 | .106    | .030               | .871    |                            |         | .090  | .649    | .093               | .637    |
|                                                                                                                                                                                               | Change PTDC vs BDC |                |         | .126  | .501    | -.038              | .840    |                            |         | .249  | .202    | .210               | .284    |
| BMI (kg/mq)                                                                                                                                                                                   | BDC                | -.019          | .917    | .271  | .140    | .299               | .102    | .156                       | .418    | .183  | .350    | .094               | .636    |
|                                                                                                                                                                                               | PTDC               |                |         | .247  | .180    | .229               | .215    |                            |         | .228  | .243    | .124               | .529    |
|                                                                                                                                                                                               | Change PTDC vs BDC |                |         | -.018 | .925    | -.077              | .680    |                            |         | .241  | .216    | .227               | .246    |
| Waist (cm)                                                                                                                                                                                    | BDC                | -.252          | .164    | -.092 | .623    | .123               | .511    | .091                       | .638    | -.259 | .183    | -.257              | .187    |
|                                                                                                                                                                                               | PTDC               |                |         | -.025 | .895    | .224               | .225    |                            |         | -.136 | .490    | -.230              | .239    |
|                                                                                                                                                                                               | Change PTDC vs BDC |                |         | .179  | .336    | .177               | .342    |                            |         | .211  | .282    | .093               | .640    |
| FM (kg)                                                                                                                                                                                       | BDC                | .118           | .520    | .210  | .257    | .060               | .746    | .267                       | .162    | .463  | .013    | .221               | .259    |
|                                                                                                                                                                                               | PTDC               |                |         | .255  | .166    | -.008              | .966    |                            |         | .434  | .021    | .218               | .265    |
|                                                                                                                                                                                               | Change PTDC vs BDC |                |         | .057  | .760    | -.205              | .267    |                            |         | .253  | .194    | .221               | .259    |
| FM (%)                                                                                                                                                                                        | BDC                | .379           | .032    | .432  | .015    | -.064              | .732    | .168                       | .384    | .506  | .006    | .359               | .061    |
|                                                                                                                                                                                               | PTDC               |                |         | .419  | .019    | -.080              | .668    |                            |         | .460  | .014    | .260               | .182    |
|                                                                                                                                                                                               | Change PTDC vs BDC |                |         | .092  | .621    | -.148              | .427    |                            |         | .253  | .194    | .230               | .239    |
| FFM (kg)                                                                                                                                                                                      | BDC                | -.454          | .009    | -.518 | .003    | .072               | .700    | -.092                      | .634    | -.298 | .124    | -.204              | .299    |
|                                                                                                                                                                                               | PTDC               |                |         | -.490 | .005    | .083               | .658    |                            |         | -.236 | .227    | -.163              | .407    |
|                                                                                                                                                                                               | Change PTDC vs BDC |                |         | -.016 | .930    | -.015              | .936    |                            |         | .264  | .175    | .175               | .372    |
| FFM (%)                                                                                                                                                                                       | BDC                | -.376          | .034    | -.432 | .015    | .064               | .732    | -.174                      | .367    | -.506 | .006    | -.359              | .061    |
|                                                                                                                                                                                               | PTDC               |                |         | -.418 | .019    | .085               | .649    |                            |         | -.428 | .023    | -.224              | .252    |
|                                                                                                                                                                                               | Change PTDC vs BDC |                |         | -.063 | .737    | .157               | .399    |                            |         | -.175 | .373    | -.165              | .402    |
| BMI, Body Mass Index; Waist, Waist circumference; FM, Fat Mass; FFM, Free Fat Mass. BDC, Baseline Data Collection; PTDC, Post Training Data Collection. Data are expressed as Spearman's Rho. |                    |                |         |       |         |                    |         |                            |         |       |         |                    |         |

**Table S5.** Bivariate Correlation Analyses between Irisin Plasma Levels or FNDC5 Gene Expression and Metabolic Measures

|                                                                                                                                                                                                                                                                                                                                                                              |                    | Irisin (µg/ml) |         |       |         |                    |         | FNDC5 gene expression (RQ) |         |       |         |                    |         |
|------------------------------------------------------------------------------------------------------------------------------------------------------------------------------------------------------------------------------------------------------------------------------------------------------------------------------------------------------------------------------|--------------------|----------------|---------|-------|---------|--------------------|---------|----------------------------|---------|-------|---------|--------------------|---------|
|                                                                                                                                                                                                                                                                                                                                                                              |                    | BDC            |         | PTDC  |         | Change PTDC vs BDC |         | BDC                        |         | PTDC  |         | Change PTDC vs BDC |         |
|                                                                                                                                                                                                                                                                                                                                                                              |                    | Rho            | P value | Rho   | P value | Rho                | P value | Rho                        | P value | Rho   | P value | Rho                | P value |
| Glucose (mg/dl)                                                                                                                                                                                                                                                                                                                                                              | BDC                | -.057          | .758    | -.005 | .980    | .257               | .163    | -.194                      | .313    | .085  | .669    | .172               | .380    |
|                                                                                                                                                                                                                                                                                                                                                                              | PTDC               |                |         | .023  | .903    | .107               | .567    |                            |         | .105  | .593    | .217               | .268    |
|                                                                                                                                                                                                                                                                                                                                                                              | Change PTDC vs BDC |                |         | .024  | .899    | -.200              | .280    |                            |         | .028  | .888    | .003               | .989    |
| Insulin (µU/ml)                                                                                                                                                                                                                                                                                                                                                              | BDC                | -.093          | .612    | .066  | .725    | .322               | .077    | .136                       | .483    | .136  | .489    | .040               | .840    |
|                                                                                                                                                                                                                                                                                                                                                                              | PTDC               |                |         | -.095 | .611    | .174               | .348    |                            |         | .094  | .635    | .021               | .914    |
|                                                                                                                                                                                                                                                                                                                                                                              | Change PTDC vs BDC |                |         | -.123 | .510    | -.007              | .968    |                            |         | -.080 | .685    | -.108              | .584    |
| HOMA IR index                                                                                                                                                                                                                                                                                                                                                                | BDC                | -.127          | .488    | .029  | .877    | .357               | .049    | .106                       | .583    | .210  | .284    | .132               | .503    |
|                                                                                                                                                                                                                                                                                                                                                                              | PTDC               |                |         | -.130 | .484    | .187               | .313    |                            |         | .086  | .664    | .026               | .894    |
|                                                                                                                                                                                                                                                                                                                                                                              | Change PTDC vs BDC |                |         | -.142 | .445    | -.056              | .766    |                            |         | -.101 | .610    | -.131              | .505    |
| IGF1 (ng/ml)                                                                                                                                                                                                                                                                                                                                                                 | BDC                | .068           | .711    | -.177 | .340    | -.231              | .210    | -.010                      | .960    | .313  | .105    | .327               | .089    |
|                                                                                                                                                                                                                                                                                                                                                                              | PTDC               |                |         | -.197 | .288    | -.041              | .826    |                            |         | .273  | .161    | .336               | .080    |
|                                                                                                                                                                                                                                                                                                                                                                              | Change PTDC vs BDC |                |         | .243  | .188    | .415               | .020    |                            |         | .159  | .418    | .122               | .538    |
| Cortisol (ng/ml)                                                                                                                                                                                                                                                                                                                                                             | BDC                | -.057          | .757    | -.321 | .078    | -.135              | .467    | .084                       | .666    | -.094 | .636    | -.139              | .480    |
|                                                                                                                                                                                                                                                                                                                                                                              | PTDC               |                |         | .125  | .503    | -.105              | .575    |                            |         | -.031 | .875    | .171               | .385    |
|                                                                                                                                                                                                                                                                                                                                                                              | Change PTDC vs BDC |                |         | .440  | .013    | .075               | .687    |                            |         | .152  | .440    | .414               | .029    |
| hsCRP (mg/dl)                                                                                                                                                                                                                                                                                                                                                                | BDC                | .355           | .046    | .280  | .127    | -.116              | .534    | -.109                      | .572    | .360  | .060    | .367               | .054    |
|                                                                                                                                                                                                                                                                                                                                                                              | PTDC               |                |         | .155  | .406    | -.174              | .348    |                            |         | .269  | .167    | .169               | .391    |
|                                                                                                                                                                                                                                                                                                                                                                              | Change PTDC vs BDC |                |         | -.260 | .157    | -.124              | .507    |                            |         | -.069 | .727    | -.142              | .472    |
| Total-C (mg/dl)                                                                                                                                                                                                                                                                                                                                                              | BDC                | .018           | .921    | -.053 | .778    | .163               | .382    | -.226                      | .239    | -.163 | .407    | -.084              | .670    |
|                                                                                                                                                                                                                                                                                                                                                                              | PTDC               |                |         | .042  | .821    | .024               | .897    |                            |         | .005  | .980    | .170               | .388    |
|                                                                                                                                                                                                                                                                                                                                                                              | Change PTDC vs BDC |                |         | .076  | .684    | -.143              | .442    |                            |         | .140  | .477    | .201               | .304    |
| LDL-C (mg/dl)                                                                                                                                                                                                                                                                                                                                                                | BDC                | .063           | .732    | -.094 | .615    | .073               | .696    | -.245                      | .201    | -.284 | .144    | -.171              | .385    |
|                                                                                                                                                                                                                                                                                                                                                                              | PTDC               |                |         | -.040 | .829    | -.049              | .794    |                            |         | -.151 | .445    | .038               | .847    |
|                                                                                                                                                                                                                                                                                                                                                                              | Change PTDC vs BDC |                |         | -.109 | .560    | -.221              | .232    |                            |         | .117  | .553    | .282               | .145    |
| HDL-C (mg/dl)                                                                                                                                                                                                                                                                                                                                                                | BDC                | .210           | .249    | .365  | .044    | .081               | .663    | .033                       | .863    | .188  | .337    | .125               | .527    |
|                                                                                                                                                                                                                                                                                                                                                                              | PTDC               |                |         | .515  | .003    | .084               | .653    |                            |         | .200  | .307    | .195               | .319    |
|                                                                                                                                                                                                                                                                                                                                                                              | Change PTDC vs BDC |                |         | .193  | .298    | -.132              | .478    |                            |         | .054  | .784    | -.022              | .910    |
| Triglycerides (mg/dl)                                                                                                                                                                                                                                                                                                                                                        | BDC                | .007           | .970    | -.183 | .324    | -.051              | .786    | -.237                      | .215    | .007  | .971    | .025               | .901    |
|                                                                                                                                                                                                                                                                                                                                                                              | PTDC               |                |         | -.202 | .276    | -.094              | .614    |                            |         | -.106 | .593    | -.130              | .511    |
|                                                                                                                                                                                                                                                                                                                                                                              | Change PTDC vs BDC |                |         | .109  | .560    | .013               | .943    |                            |         | -.005 | .980    | .012               | .952    |
| HOMA IR index, HOmeostasis Model Assessment Insulin Resistance; IGF1, Insulin-like Growth Factor 1; hsCRP, high-sensitivity C-Reactive Protein; Total-C, Total Cholesterol; LDL-C, LDL Cholesterol calculated using Friedewald's Equation; HDL-C, HDL Cholesterol. BDC, Baseline Data Collection; PTDC, Post Training Data Collection. Data are expressed as Spearman's Rho. |                    |                |         |       |         |                    |         |                            |         |       |         |                    |         |

**Table S6.** Changes in anthropometrics, body composition, training and metabolic measures stratified by median level of irisin change after 12-week of training program among obese healthy participants.

| Measures                | Group                                   | Intervention       |                     | Intervention Effect                    |                |                   | Intervention x Group effect             |                |                   |
|-------------------------|-----------------------------------------|--------------------|---------------------|----------------------------------------|----------------|-------------------|-----------------------------------------|----------------|-------------------|
|                         | <i>above/below median change Irisin</i> | <i>BDC Mean±SD</i> | <i>PTDC Mean±SD</i> | <i>Change within group MD (95% CI)</i> | <i>P value</i> | <i>Partial η2</i> | <i>Change between group MD (95% CI)</i> | <i>P value</i> | <i>Partial η2</i> |
| VO2 peak (ml)           | <i>below median</i>                     | 2852.4±753.0       | 3133.5±756.8        | 300.5 (211.5 – 389.4)                  | .0001          | .622              | 281.1 (173.3 – 388.9)                   | .659           | .007              |
|                         | <i>above median</i>                     | 3059.2±754.1       | 3379.0±819.0        |                                        |                |                   | 319.8 (165.6 – 474.1)                   |                |                   |
| VO2 peak/weight (ml/kg) | <i>below median</i>                     | 27.7±6.9           | 32.1±7.4            | 4.8 (3.6 – 5.9)                        | .0001          | .713              | 4.4 (3.0 – 5.8)                         | .570           | .011              |
|                         | <i>above median</i>                     | 28.6±5.2           | 33.6±6.2            |                                        |                |                   | 5.1 (3.1 – 7.1)                         |                |                   |
| HR (bpm)                | <i>below median</i>                     | 68.5±9.7           | 59.0±8.2            | -10.8 (-13.9 – -7.6)                   | .0001          | .626              | -9.5 (-14.7 – -4.3)                     | .414           | .023              |
|                         | <i>above median</i>                     | 77.3±10.1          | 65.2±10.7           |                                        |                |                   | -12.1 (-16.0 – -8.2)                    |                |                   |
| DBP mmHg)               | <i>below median</i>                     | 73.4±10.5          | 70.3±9.8            | -5.7 (-9.2 – -2.2)                     | .002           | .282              | -3.2 (-8.3 – 2.0)                       | .142           | .073              |
|                         | <i>above median</i>                     | 75.1±10.6          | 66.8±10.4           |                                        |                |                   | -8.3 (-13.4 – -3.1)                     |                |                   |
| DAI (kcal/die)          | <i>below median</i>                     | 2022.7±657.1       | 1592.4±578.4        | -411.0 (-625.2 – -196.7)               | .0001          | .347              | -430.3 (-712.6 – -148.0)                | .855           | .001              |
|                         | <i>above median</i>                     | 2143.3±660.5       | 1751.6±488.5        |                                        |                |                   | -391.6 (-743.3 – -39.9)                 |                |                   |
| Weight (kg)             | <i>below median</i>                     | 103.3±13.3         | 98.1±13.0           | -5.9 (-7.8 – -4.0)                     | .0001          | .583              | -5.3 (-8.0 – -2.5)                      | .494           | .016              |
|                         | <i>above median</i>                     | 106.8±16.1         | 100.3±16.5          |                                        |                |                   | -6.5 (-9.3 – -3.7 )                     |                |                   |
| BMI (kg/mq)             | <i>below median</i>                     | 34.7±4.4           | 33.0±4.4            | -2.0 (-2.7 – -1.4)                     | .0001          | .583              | -1.8 (-2.7 – -.8)                       | .460           | .019              |
|                         | <i>above median</i>                     | 36.5±4.4           | 34.2±4.6            |                                        |                |                   | -4.1 (-17.6 – 25.8)                     |                |                   |
| Waist (cm)              | <i>below median</i>                     | 111.2±9.0          | 106.4±8.2           | -5.1 (-13.7 – 3.5)                     | .0001          | .425              | -4.8 (-7.0 – -2.6)                      | .370           | .028              |
|                         | <i>above median</i>                     | 115.6±13.9         | 112.3±15.4          |                                        |                |                   | -3.2 (-6.3 – -.2)                       |                |                   |
| FM (kg)                 | <i>below median</i>                     | 37.8±11.0          | 33.3±10.3           | -5.5 (-7.3 – -3.7)                     | .0001          | .565              | -4.5 (-7.0 – -2.0)                      | .265           | .043              |
|                         | <i>above median</i>                     | 38.6±8.4           | 32.1±9.1            |                                        |                |                   | -6.5 (-9.4 – -3.6)                      |                |                   |
| FM (%)                  | <i>below median</i>                     | 36.6±9.4           | 34.0±9.3            | -3.4 (-4.7 – -2.0)                     | .0001          | .475              | -2.6 (-4.0 – -1.1)                      | .235           | .048              |
|                         | <i>above median</i>                     | 36.5±7.3           | 32.3±8.5            |                                        |                |                   | -4.2 (-6.6 – -1.7 )                     |                |                   |
| FFM (kg)                | <i>below median</i>                     | 65.7±13.6          | 64.7±13.3           | -.5 (-1.7– .6)                         | .360           | .029              | -1.0 (-1.9 – -.1)                       | .398           | .025              |
|                         | <i>above median</i>                     | 68.2±14.3          | 68.2±14.9           |                                        |                |                   | .0 (-2.3 – 2.2)                         |                |                   |
| FFM (%)                 | <i>below median</i>                     | 63.4±9.5           | 65.8±9.2            | 3.3 (1.9 – 4.7)                        | .0001          | .448              | 2.4 (.9 – 3.9)                          | .197           | .057              |
|                         | <i>above median</i>                     | 63.5±7.3           | 67.7±8.5            |                                        |                |                   | 4.2 (1.7 – 6.7)                         |                |                   |
| Total-C (mg/dl)         | <i>below median</i>                     | 220.0±27.6         | 204.6±30.6          | -18.1 (-28.3 – -7.9)                   | .001           | .313              | -15.4 (-31.2 – .4)                      | .592           | .010              |
|                         | <i>above median</i>                     | 220.0±46.4         | 199.3±43.7          |                                        |                |                   | -20.8 (-34.9 – -6.7)                    |                |                   |
| LDL-C (mg/dl)           | <i>below median</i>                     | 146.9±25.4         | 132.8±28.4          | -15.6 (-24.3 – -6.9)                   | .001           | .316              | -14.1 (-27.7 – -.5)                     | .727           | .004              |
|                         | <i>above median</i>                     | 143.5±35.2         | 126.4±39.4          |                                        |                |                   | -17.1 (-29.1 – -5.1)                    |                |                   |

VO2, Volume of Oxygen; HR, Heart rate; DBP, Diastolic Blood Pressure; DCI, Daily Calorie Intake; BMI, Body Mass Index; Waist, Waist circumference; FM, Fat Mass; FFM, Free Fat Mass; Total-C, Total Cholesterol; LDL-C, LDL Cholesterol calculated using Friedewald's Equation. BDC, Baseline Data Collection; PTDC, Post Training Data Collection. Analysis performed with General Linear Model (GLM) Repeated Measures, Within-Subjects and Between-Subjects test. Mean ± standard deviation (SD); median deviation (MD) and 95% confidence intervals (95% CI).
